# Supplementary material
Source: MDPI journal article supplement (https://www.mdpi.com/2504-5377/7/1/4)
Supplement: s1 [file s1]

## Supplementary material

### Anion effects on the liquid-liquid equilibrium behavior of pluronic L64 + water + sodium salts at different pH: Determination of thermodynamic parameters

Edson G. Monteiro-Junior <sup>1</sup>, Josiel M. Costa <sup>2\*</sup>, Otto A. Q. Jimenez <sup>1</sup>, Bruno R. de Souza <sup>1</sup>, Abimael C. Medeiros <sup>1</sup> and Rodrigo C. Basso <sup>1</sup>

<sup>1</sup> Science and Technology Institute, Federal University of Alfenas (UNIFAL-MG), José Aurélio Vilela Road, 11999, BR 267, Km 533, Poços de Caldas 37715-400, MG, Brazil

<sup>2</sup> School of Food Engineering (FEA), University of Campinas (UNICAMP), Campinas 13083-862, SP, Brazil

\* Correspondence: josiel.martins.costa@gmail.com or josiel@unicamp.br

**Table S1.** Coefficients from binodal curves for the salt and polymer rich-phase.

| pH   | Salt                        | Coefficient - (Equation 3 and 4) |        |         |        | R <sup>2</sup> |
|------|-----------------------------|----------------------------------|--------|---------|--------|----------------|
|      |                             | a                                | b      | c       | d      |                |
| 5.0  | Sodium sulfate              | -521.86                          | 198.5  | -23.916 | 0.9199 | 0.9768         |
|      | Sodium citrate              | -348.05                          | 152    | -21.812 | 1.105  | 0.9921         |
|      | Sodium tartrate             | -109.68                          | 67.048 | -13.416 | 0.9285 | 0.9965         |
| 7.5  | Sodium sulfate              | -438.27                          | 161.87 | -18.756 | 0.6906 | 0.9721         |
|      | Sodium citrate              | -295.71                          | 131.98 | -19.184 | 0.9426 | 0.9939         |
|      | Sodium tartrate             | -246                             | 114.01 | -17.25  | 0.8922 | 0.9972         |
| 10.0 | Sodium sulfate <sup>a</sup> | n.a                              | n.a    | n.a     | n.a    | n.a            |
|      | Sodium citrate <sup>b</sup> | n.a                              | n.a    | n.a     | n.a    | n.a            |
|      | Sodium tartrate             | -176.17                          | 92.821 | -15.197 | 0.7833 | 0.9811         |

<sup>a</sup> The adjusted equation was  $y = ex^f$ , with  $e = 0.0064$ ,  $f = -1.026$ , and  $R^2 = 0.9933$ .

<sup>b</sup> The adjusted equation was  $y = ex^f$ , with  $e = 0.0041$ ,  $f = -1.27$ , and  $R^2 = 0.9732$ .

**Table S2.** Thickness of immobilized water spherical shell surrounding the ion and effective radius of anions.

| Anion                                                      | V (cm <sup>3</sup> mol <sup>-1</sup> ) | r (nm) | Δr (nm) | (r + Δr) (nm) |
|------------------------------------------------------------|----------------------------------------|--------|---------|---------------|
| C <sub>6</sub> H <sub>5</sub> O <sub>7</sub> <sup>3-</sup> | 72.0                                   | 0.3056 | 0.0301  | 0.3357        |
| SO <sub>4</sub> <sup>2-</sup>                              | 36.5                                   | 0.2437 | 0.0375  | 0.2812        |
| C <sub>4</sub> H <sub>4</sub> O <sub>6</sub> <sup>2-</sup> | 60.1                                   | 0.2878 | 0.0243  | 0.3121        |
